# Supplementary material for: Effect of Low-Input Organic and Conventional Farming Systems on Maize Rhizosphere in Two Portuguese Open-Pollinated Varieties (OPV), “Pigarro” (Improved Landrace) and “SinPre” (a Composite Cross Population)
Source: PubMed Central journal article supplement (PMC7953162; doi:10.3389/fmicb.2021.636009), 2021-02-26
Supplement: Table_1.pdf [file Table_1.pdf]

Effect of Low Input Organic and Conventional farming systems on maize rhizosphere in two Portuguese OPV, ‘Pigarro’ (improved landrace) and ‘SinPre’ (a Composite Cross Population)

**Aitana Ares, Joana Costa\*, Carolina Joaquim, Duarte Pintado, Daniela Santos, Monika M. Messmer, Pedro Mendes-Moreira**

**Supplementary Table 1.** Soil characterization of the trial locations in august 2019

| <b>Soil parameter</b> | <b>Organic Farming System</b> | <b>Conventional Farming System</b> |
|-----------------------|-------------------------------|------------------------------------|
| Field texture         | Medium                        | Medium                             |
| Organic matter        | 1.8%                          | 0.8%                               |
| pH                    | 6.4                           | 6.7                                |
| Available phosphorus  | High                          | Very high                          |
| Available potassium   | Very high                     | High                               |
