# Supplementary material for: Effect of Low-Input Organic and Conventional Farming Systems on Maize Rhizosphere in Two Portuguese Open-Pollinated Varieties (OPV), “Pigarro” (Improved Landrace) and “SinPre” (a Composite Cross Population)
Source: PubMed Central journal article supplement (PMC7953162; doi:10.3389/fmicb.2021.636009), 2021-02-26
Supplement: Table_2.pdf [file Table_2.pdf]

Effect of Low Input Organic and Conventional farming systems on maize rhizosphere in two Portuguese OPV, ‘Pigarro’ (improved landrace) and ‘SinPre’ (a Composite Cross Population)

**Aitana Ares, Joana Costa\*, Carolina Joaquim, Duarte Pintado, Daniela Santos, Monika M. Messmer, Pedro Mendes-Moreira**

**Supplementary Table 2.** Characterization of maize populations using HUNTERS descriptors in conventional and organic farming systems.

|     | ‘SinPre’    |              | ‘Pigarro’   |              |
|-----|-------------|--------------|-------------|--------------|
|     | Organic     | Conventional | Organic     | Conventional |
| H   | 206.2±24.45 | 262.3±24.86  | 250.4±22.09 | 236.4±25.46  |
| H1E | 114.6±21.12 | 159.85±22.4  | 152.6±19.47 | 174.3± 21.61 |
| U   | 2           | 2.7 ±0.58    | 4           | 2            |
| N   | 6           | 6            | 5           | 5.3±0.58     |
| T   | 5           | 5.3±0.58     | 5           | 5.3±0.58     |
| E   | 5           | 5.3±0.58     | 5.7±0.58    | 6.3          |
| %R  | 0           | 0            | 2.5±0.89    | 4.1±4.81     |
| %S  | 3           | 17.1±6.59    | 10.5±1.15   | 16±5.26      |

height (H); the height of 1st ear insertion (H1E), uniformity (U), Root (R%) and Stalk lodging percentage (S%).
