# Supplementary material for: Effect of Low-Input Organic and Conventional Farming Systems on Maize Rhizosphere in Two Portuguese Open-Pollinated Varieties (OPV), “Pigarro” (Improved Landrace) and “SinPre” (a Composite Cross Population)
Source: PubMed Central journal article supplement (PMC7953162; doi:10.3389/fmicb.2021.636009), 2021-02-26
Supplement: Table_3.pdf [file Table_3.pdf]

Eurotiomycetes

Eurotiales

Trichocomaceae

*Penicillium*

62

|     |      |    |    |     |     |      |     |     |      |     |      |
|-----|------|----|----|-----|-----|------|-----|-----|------|-----|------|
| 0   | 0    | 0  | 0  | 0   | 0   | 0    | 0   | 0   | 2    | 4   | 11   |
| 0   | 0    | 0  | 2  | 0   | 1   | 0    | 0   | 0   | 0    | 15  | 0    |
| 0   | 0    | 0  | 0  | 0   | 6   | 0    | 0   | 0   | 12   | 0   | 0    |
| 0   | 0    | 0  | 11 | 0   | 2   | 0    | 0   | 0   | 0    | 7   | 0    |
| 0   | 0    | 0  | 0  | 0   | 0   | 0    | 0   | 20  | 0    | 0   | 0    |
| 0   | 0    | 0  | 0  | 0   | 0   | 0    | 0   | 0   | 25   | 0   | 0    |
| 0   | 0    | 0  | 0  | 0   | 2   | 0    | 0   | 0   | 23   | 0   | 0    |
| 0   | 0    | 0  | 9  | 0   | 3   | 0    | 0   | 0   | 1    | 20  | 0    |
| 0   | 0    | 0  | 10 | 0   | 4   | 0    | 0   | 0   | 9    | 8   | 7    |
| 0   | 0    | 0  | 0  | 19  | 0   | 0    | 0   | 0   | 9    | 11  | 0    |
| 0   | 0    | 0  | 0  | 0   | 0   | 0    | 0   | 0   | 43   | 0   | 0    |
| 0   | 23   | 0  | 0  | 2   | 2   | 1    | 0   | 0   | 16   | 0   | 6    |
| 0   | 3    | 0  | 0  | 0   | 5   | 0    | 0   | 0   | 4    | 35  | 7    |
| 0   | 2    | 0  | 3  | 1   | 11  | 0    | 0   | 0   | 15   | 16  | 6    |
| 0   | 3    | 0  | 3  | 4   | 9   | 0    | 0   | 0   | 22   | 20  | 8    |
| 0   | 0    | 0  | 21 | 4   | 13  | 0    | 0   | 0   | 14   | 18  | 2    |
| 0   | 12   | 0  | 8  | 0   | 2   | 0    | 0   | 0   | 5    | 8   | 37   |
| 0   | 0    | 0  | 5  | 27  | 2   | 0    | 0   | 0   | 4    | 41  | 0    |
| 0   | 39   | 0  | 2  | 7   | 0   | 1    | 0   | 0   | 32   | 0   | 5    |
| 0   | 2    | 0  | 0  | 0   | 10  | 0    | 0   | 0   | 21   | 51  | 4    |
| 0   | 37   | 0  | 0  | 5   | 3   | 0    | 0   | 0   | 37   | 0   | 11   |
| 0   | 0    | 0  | 7  | 1   | 3   | 0    | 0   | 0   | 46   | 12  | 29   |
| 0   | 0    | 0  | 4  | 0   | 12  | 0    | 0   | 0   | 32   | 34  | 16   |
| 0   | 1    | 0  | 0  | 4   | 19  | 0    | 0   | 0   | 37   | 29  | 17   |
| 0   | 24   | 2  | 40 | 1   | 2   | 3    | 0   | 0   | 21   | 17  | 17   |
| 0   | 0    | 0  | 0  | 137 | 0   | 0    | 0   | 0   | 0    | 0   | 0    |
| 0   | 45   | 0  | 3  | 4   | 14  | 2    | 0   | 0   | 37   | 20  | 15   |
| 0   | 0    | 0  | 11 | 11  | 1   | 0    | 0   | 0   | 62   | 54  | 12   |
| 0   | 86   | 0  | 6  | 29  | 1   | 3    | 0   | 0   | 43   | 6   | 18   |
| 0   | 1    | 0  | 7  | 10  | 17  | 3    | 2   | 0   | 95   | 66  | 19   |
| 0   | 0    | 0  | 4  | 0   | 0   | 0    | 0   | 0   | 90   | 58  | 94   |
| 0   | 0    | 0  | 8  | 16  | 20  | 0    | 0   | 0   | 113  | 79  | 53   |
| 0   | 126  | 0  | 8  | 17  | 6   | 5    | 3   | 0   | 112  | 0   | 25   |
| 0   | 225  | 0  | 22 | 54  | 2   | 5    | 0   | 0   | 170  | 24  | 39   |
| 0   | 0    | 0  | 24 | 0   | 4   | 0    | 0   | 0   | 263  | 185 | 342  |
| 0   | 0    | 0  | 70 | 364 | 139 | 0    | 0   | 0   | 115  | 393 | 139  |
| 0   | 0    | 0  | 5  | 220 | 297 | 0    | 0   | 0   | 1085 | 935 | 377  |
| 0   | 0    | 0  | 0  | 0   | 0   | 0    | 0   | 0   | 1    | 1   | 0    |
| 0   | 0    | 0  | 0  | 2   | 0   | 0    | 0   | 0   | 0    | 0   | 0    |
| 2   | 0    | 0  | 0  | 0   | 0   | 0    | 0   | 0   | 0    | 0   | 0    |
| 0   | 0    | 0  | 0  | 0   | 0   | 0    | 0   | 2   | 0    | 0   | 0    |
| 0   | 0    | 0  | 0  | 0   | 0   | 0    | 0   | 0   | 0    | 2   | 0    |
| 0   | 0    | 0  | 0  | 0   | 0   | 0    | 0   | 0   | 0    | 0   | 2    |
| 0   | 0    | 0  | 0  | 0   | 0   | 0    | 2   | 0   | 0    | 0   | 0    |
| 0   | 0    | 0  | 0  | 0   | 0   | 0    | 0   | 0   | 0    | 0   | 3    |
| 0   | 0    | 0  | 0  | 0   | 0   | 2    | 1   | 0   | 0    | 0   | 0    |
| 0   | 0    | 0  | 0  | 0   | 0   | 3    | 1   | 0   | 0    | 0   | 0    |
| 0   | 0    | 3  | 0  | 0   | 0   | 0    | 0   | 1   | 0    | 0   | 0    |
| 0   | 0    | 0  | 8  | 0   | 0   | 0    | 0   | 0   | 0    | 0   | 0    |
| 0   | 1    | 0  | 1  | 0   | 5   | 0    | 0   | 1   | 0    | 0   | 0    |
| 4   | 0    | 7  | 0  | 0   | 0   | 0    | 0   | 0   | 0    | 0   | 0    |
| 0   | 0    | 0  | 0  | 0   | 0   | 0    | 0   | 0   | 0    | 0   | 12   |
| 0   | 0    | 0  | 0  | 0   | 10  | 0    | 0   | 3   | 0    | 0   | 0    |
| 7   | 1    | 0  | 0  | 0   | 0   | 1    | 5   | 0   | 0    | 0   | 0    |
| 0   | 0    | 0  | 17 | 0   | 0   | 0    | 0   | 0   | 0    | 1   | 0    |
| 0   | 0    | 0  | 0  | 0   | 0   | 0    | 0   | 36  | 0    | 0   | 0    |
| 0   | 0    | 0  | 0  | 28  | 17  | 0    | 0   | 0   | 0    | 4   | 0    |
| 9   | 1    | 6  | 0  | 0   | 0   | 0    | 0   | 0   | 6    | 29  | 7    |
| 0   | 71   | 0  | 0  | 0   | 0   | 0    | 0   | 0   | 0    | 0   | 0    |
| 15  | 0    | 5  | 0  | 0   | 0   | 0    | 0   | 0   | 41   | 21  | 0    |
| 0   | 0    | 0  | 7  | 0   | 44  | 0    | 0   | 0   | 53   | 0   | 6    |
| 8   | 0    | 0  | 0  | 0   | 0   | 0    | 0   | 0   | 115  | 0   | 0    |
| 0   | 0    | 0  | 0  | 0   | 0   | 0    | 0   | 0   | 0    | 182 | 0    |
| 0   | 0    | 0  | 0  | 0   | 0   | 185  | 32  | 2   | 0    | 0   | 0    |
| 0   | 0    | 0  | 0  | 0   | 0   | 0    | 0   | 219 | 0    | 0   | 0    |
| 4   | 11   | 24 | 21 | 0   | 0   | 9    | 0   | 333 | 0    | 56  | 2    |
| 0   | 0    | 0  | 0  | 580 | 0   | 0    | 0   | 0   | 0    | 0   | 0    |
| 93  | 1304 | 0  | 0  | 0   | 0   | 0    | 0   | 17  | 0    | 0   | 0    |
| 346 | 567  | 35 | 0  | 0   | 0   | 296  | 35  | 41  | 0    | 253 | 2    |
| 18  | 150  | 10 | 6  | 0   | 24  | 27   | 183 | 54  | 2    | 9   | 1973 |
| 87  | 1011 | 45 | 20 | 23  | 1   | 2886 | 805 | 93  | 0    | 0   | 0    |















Agaricomycetes

|            |              |                      |                       |   |   |    |    |    |    |   |    |   |    |    |   |   |
|------------|--------------|----------------------|-----------------------|---|---|----|----|----|----|---|----|---|----|----|---|---|
| Agaricales | Bolbitiaceae | <i>Conocybe</i>      | 8                     | 0 | 0 | 2  | 2  | 0  | 0  | 0 | 0  | 0 | 0  | 0  | 2 | 0 |
|            |              |                      |                       | 0 | 0 | 0  | 0  | 0  | 5  | 0 | 0  | 0 | 1  | 0  | 0 |   |
|            |              |                      |                       | 0 | 0 | 0  | 6  | 0  | 0  | 0 | 0  | 0 | 0  | 0  | 0 |   |
|            |              |                      |                       | 0 | 0 | 6  | 0  | 0  | 0  | 0 | 0  | 0 | 0  | 0  | 0 |   |
|            |              |                      |                       | 0 | 0 | 1  | 0  | 0  | 0  | 0 | 0  | 0 | 0  | 0  | 0 | 5 |
|            |              |                      |                       | 0 | 0 | 0  | 0  | 0  | 7  | 0 | 0  | 0 | 0  | 0  | 0 |   |
|            |              |                      |                       | 0 | 0 | 0  | 0  | 0  | 0  | 0 | 0  | 0 | 0  | 0  | 7 | 0 |
|            |              | Entolomataceae       | <i>Entoloma</i>       | 4 | 0 | 0  | 7  | 0  | 0  | 0 | 0  | 0 | 0  | 0  | 0 | 0 |
|            |              |                      |                       |   | 0 | 0  | 0  | 5  | 0  | 0 | 0  | 0 | 0  | 0  | 2 | 0 |
|            |              |                      |                       |   | 0 | 0  | 0  | 0  | 0  | 2 | 0  | 0 | 0  | 1  | 1 | 3 |
|            |              |                      |                       |   | 0 | 0  | 7  | 0  | 0  | 0 | 0  | 0 | 0  | 0  | 0 | 0 |
|            |              | Marasmiaceae         | <i>Marasmius</i>      | 2 | 0 | 0  | 0  | 0  | 7  | 0 | 0  | 0 | 0  | 0  | 0 | 0 |
|            |              |                      |                       |   | 0 | 0  | 0  | 0  | 7  | 0 | 0  | 0 | 0  | 0  | 0 | 0 |
|            |              | Mycenaceae           | <i>Mycena</i>         | 1 | 0 | 2  | 4  | 0  | 0  | 0 | 0  | 0 | 1  | 0  | 0 | 0 |
|            |              |                      |                       |   | 0 | 1  | 2  | 1  | 0  | 0 | 0  | 1 | 1  | 0  | 1 | 0 |
|            |              | Niaceae              | <i>Flagelloscypha</i> | 2 | 0 | 0  | 4  | 0  | 0  | 0 | 0  | 0 | 1  | 1  | 0 | 0 |
|            |              |                      |                       |   | 0 | 0  | 4  | 0  | 0  | 0 | 0  | 0 | 1  | 1  | 1 | 0 |
|            |              | Omphalotaceae        | <i>Omphalotus</i>     | 3 | 0 | 0  | 0  | 0  | 1  | 5 | 0  | 0 | 0  | 1  | 0 | 0 |
|            |              |                      |                       |   | 0 | 4  | 2  | 0  | 1  | 0 | 0  | 0 | 1  | 0  | 0 | 0 |
|            |              |                      |                       |   | 0 | 0  | 8  | 0  | 0  | 0 | 0  | 0 | 0  | 0  | 0 | 0 |
|            |              | Physalaciaceae       | <i>Armillaria</i>     | 1 | 0 | 0  | 8  | 0  | 0  | 0 | 0  | 0 | 0  | 0  | 0 | 0 |
|            |              | Pluteaceae           | <i>Pluteus</i>        | 1 | 0 | 0  | 0  | 4  | 4  | 0 | 0  | 0 | 0  | 0  | 0 | 0 |
|            |              |                      |                       |   | 8 | 0  | 0  | 0  | 0  | 0 | 0  | 0 | 0  | 0  | 0 | 0 |
|            |              |                      | <i>Psathyrella</i>    | 3 | 0 | 0  | 1  | 3  | 0  | 0 | 0  | 0 | 0  | 0  | 2 | 2 |
|            |              |                      |                       |   | 4 | 0  | 2  | 0  | 0  | 0 | 2  | 0 | 0  | 0  | 0 | 0 |
|            |              |                      | <i>Parasola</i>       | 1 | 0 | 0  | 8  | 0  | 0  | 0 | 0  | 0 | 0  | 0  | 0 | 0 |
|            |              |                      |                       |   | 0 | 0  | 2  | 0  | 0  | 2 | 0  | 0 | 0  | 4  | 0 | 0 |
|            |              |                      | <i>Coprinopsis</i>    | 5 | 0 | 6  | 1  | 0  | 0  | 0 | 1  | 0 | 0  | 0  | 0 | 0 |
|            |              |                      |                       |   | 1 | 4  | 2  | 0  | 0  | 0 | 0  | 0 | 1  | 0  | 0 | 0 |
|            |              |                      |                       |   | 0 | 0  | 1  | 3  | 3  | 0 | 0  | 0 | 2  | 0  | 0 | 0 |
|            |              |                      |                       |   | 1 | 1  | 0  | 0  | 0  | 2 | 0  | 4 | 1  | 0  | 0 | 0 |
|            |              |                      | <i>Coprinellus</i>    | 5 | 0 | 1  | 6  | 0  | 1  | 0 | 0  | 0 | 1  | 0  | 0 | 0 |
|            |              |                      |                       |   | 0 | 0  | 0  | 0  | 0  | 0 | 0  | 0 | 0  | 0  | 3 | 6 |
|            |              |                      |                       |   | 0 | 1  | 5  | 0  | 0  | 0 | 1  | 0 | 2  | 0  | 0 | 0 |
|            |              |                      |                       | 1 | 0 | 1  | 0  | 0  | 1  | 0 | 0  | 0 | 0  | 4  | 2 |   |
|            |              |                      |                       | 0 | 0 | 0  | 0  | 9  | 0  | 0 | 0  | 0 | 0  | 0  | 0 |   |
|            |              | <i>Psilocybe</i>     | 1                     | 0 | 0 | 0  | 0  | 0  | 0  | 0 | 0  | 0 | 7  | 2  | 0 |   |
|            |              | <i>Pholiota</i>      | 2                     | 0 | 0 | 0  | 0  | 9  | 0  | 0 | 0  | 0 | 0  | 0  | 0 |   |
|            |              |                      |                       | 0 | 0 | 0  | 0  | 1  | 0  | 0 | 0  | 0 | 0  | 8  | 0 |   |
|            |              | <i>Hypholoma</i>     | 1                     | 0 | 0 | 0  | 0  | 9  | 0  | 0 | 0  | 0 | 0  | 0  | 0 |   |
|            |              | <i>Hebeloma</i>      | 1                     | 1 | 0 | 0  | 0  | 0  | 0  | 0 | 0  | 0 | 0  | 0  | 8 |   |
|            |              | <i>Gymnopilus</i>    | 1                     | 0 | 0 | 6  | 0  | 0  | 0  | 0 | 0  | 3 | 0  | 0  | 0 |   |
|            |              | <i>Agrocybe</i>      | 1                     | 3 | 6 | 1  | 0  | 0  | 0  | 0 | 0  | 0 | 0  | 0  | 0 |   |
|            |              | <i>Paralepista</i>   | 1                     | 2 | 5 | 0  | 0  | 0  | 0  | 0 | 0  | 3 | 0  | 0  | 0 |   |
|            |              | <i>Lepista</i>       | 1                     | 0 | 0 | 10 | 0  | 0  | 0  | 0 | 0  | 0 | 0  | 0  | 0 |   |
|            |              | <i>Athelia</i>       | 1                     | 0 | 0 | 0  | 0  | 2  | 0  | 0 | 0  | 0 | 0  | 0  | 8 |   |
|            |              | <i>Amphinema</i>     | 1                     | 0 | 0 | 0  | 0  | 10 | 0  | 0 | 0  | 0 | 0  | 0  | 0 |   |
|            |              | <i>Scleroderma</i>   | 1                     | 0 | 0 | 0  | 0  | 10 | 0  | 0 | 0  | 0 | 0  | 0  | 0 |   |
|            |              | <i>Pisolithus</i>    | 2                     | 0 | 0 | 0  | 0  | 0  | 0  | 0 | 0  | 3 | 0  | 0  | 2 |   |
|            |              |                      |                       | 0 | 0 | 0  | 0  | 0  | 3  | 0 | 0  | 0 | 0  | 0  | 7 |   |
|            |              |                      |                       | 0 | 0 | 0  | 3  | 0  | 0  | 0 | 0  | 0 | 7  | 0  | 0 |   |
|            |              |                      |                       | 0 | 0 | 0  | 0  | 0  | 0  | 0 | 0  | 5 | 0  | 0  | 5 |   |
|            |              |                      |                       | 0 | 0 | 0  | 1  | 0  | 0  | 0 | 0  | 0 | 0  | 10 | 0 |   |
|            |              |                      |                       | 5 | 0 | 3  | 0  | 0  | 1  | 2 | 0  | 0 | 0  | 0  | 0 |   |
|            |              |                      |                       | 1 | 9 | 1  | 0  | 0  | 0  | 0 | 0  | 0 | 0  | 0  | 0 |   |
|            |              |                      |                       | 0 | 1 | 0  | 3  | 0  | 3  | 0 | 0  | 0 | 3  | 1  | 0 |   |
|            |              |                      |                       | 4 | 0 | 0  | 3  | 0  | 0  | 0 | 0  | 0 | 0  | 0  | 4 |   |
|            |              |                      |                       | 2 | 2 | 0  | 0  | 0  | 7  | 0 | 0  | 0 | 0  | 0  | 0 |   |
|            |              | <i>Thanatephorus</i> | 1                     | 0 | 0 | 0  | 1  | 0  | 0  | 0 | 0  | 0 | 0  | 10 | 0 |   |
|            |              | <i>Rhizoctonia</i>   | 1                     | 0 | 0 | 0  | 1  | 0  | 2  | 0 | 0  | 0 | 2  | 0  | 6 |   |
|            |              | <i>Hydnum</i>        | 1                     | 1 | 1 | 7  | 0  | 0  | 0  | 0 | 1  | 2 | 0  | 0  | 0 |   |
|            |              | <i>Waitea</i>        | 1                     | 0 | 0 | 0  | 0  | 7  | 0  | 0 | 0  | 0 | 0  | 5  | 0 |   |
|            |              | <i>Sphaerobolus</i>  | 1                     | 0 | 0 | 1  | 0  | 7  | 0  | 0 | 0  | 0 | 2  | 0  | 2 |   |
|            |              |                      |                       | 0 | 0 | 0  | 10 | 0  | 0  | 0 | 0  | 0 | 2  | 0  | 0 |   |
|            |              |                      |                       | 0 | 0 | 0  | 10 | 0  | 0  | 0 | 0  | 0 | 0  | 0  | 2 |   |
|            |              | <i>Phallus</i>       | 2                     | 0 | 0 | 0  | 0  | 0  | 11 | 0 | 0  | 0 | 1  | 0  | 0 |   |
|            |              | <i>Clathrus</i>      | 1                     | 0 | 0 | 0  | 0  | 0  | 11 | 0 | 0  | 0 | 1  | 0  | 0 |   |
|            |              |                      |                       | 0 | 0 | 0  | 0  | 0  | 0  | 0 | 11 | 0 | 0  | 1  | 0 |   |
|            |              |                      |                       | 0 | 0 | 3  | 0  | 0  | 0  | 0 | 0  | 6 | 0  | 3  | 0 |   |
|            |              | <i>Rigidoporus</i>   | 1                     | 0 | 0 | 1  | 4  | 0  | 0  | 2 | 0  | 0 | 1  | 4  | 0 |   |
|            |              | <i>Steccherinum</i>  | 1                     | 0 | 0 | 0  | 0  | 0  | 0  | 0 | 0  | 0 | 13 | 0  | 0 |   |
|            |              | <i>Abortiporus</i>   | 1                     | 0 | 0 | 0  | 0  | 0  | 0  | 0 | 0  | 0 | 13 | 0  | 0 |   |
|            |              | <i>Skeletocutis</i>  | 1                     | 0 | 0 | 0  | 9  | 0  | 2  | 0 | 0  | 0 | 0  | 2  | 0 |   |
|            |              | <i>Peniophora</i>    | 1                     | 0 | 0 | 0  | 0  | 0  | 10 | 0 | 0  | 0 | 3  | 0  | 0 |   |
|            |              |                      |                       | 0 | 0 | 0  | 0  | 0  | 10 | 0 | 0  | 0 | 3  | 0  | 0 |   |
|            |              |                      |                       | 0 | 0 | 0  | 0  | 0  | 10 | 0 | 0  | 0 | 3  | 0  | 0 |   |

|               |                      |                                        |                                        |                          |                     |                                        |                   |                      |    |    |    |    |    |   |    |    |    |                   |
|---------------|----------------------|----------------------------------------|----------------------------------------|--------------------------|---------------------|----------------------------------------|-------------------|----------------------|----|----|----|----|----|---|----|----|----|-------------------|
| Basidiomycota | Sebacinales          | Sebacinaeae                            | <i>Efibulobasidium</i>                 | 1                        | 0                   | 13                                     | 0                 | 0                    | 0  | 0  | 0  | 0  | 0  | 0 | 0  | 0  | 0  |                   |
|               |                      | Sebacinales_Group_B                    | <i>Serendipita</i>                     | 1                        | 4                   | 0                                      | 0                 | 0                    | 0  | 0  | 3  | 0  | 6  | 0 | 0  | 0  | 0  |                   |
|               | Theleporales         | Theleporaceae                          | <i>Piriformospora</i>                  | 1                        | 0                   | 0                                      | 0                 | 7                    | 2  | 4  | 0  | 0  | 0  | 0 | 0  | 0  | 0  |                   |
|               |                      |                                        | <i>Tomentella</i>                      | 1                        | 0                   | 0                                      | 0                 | 14                   | 0  | 0  | 0  | 0  | 0  | 0 | 0  | 0  | 0  |                   |
|               | Trechisporales       | Hydnodontaceae                         | <i>Trechispora</i>                     | 4                        | 3                   | 8                                      | 2                 | 0                    | 0  | 0  | 0  | 1  | 0  | 0 | 0  | 0  | 0  |                   |
|               |                      |                                        |                                        |                          | 0                   | 0                                      | 0                 | 7                    | 0  | 0  | 0  | 0  | 0  | 0 | 7  | 0  |    |                   |
|               |                      |                                        |                                        |                          | 0                   | 0                                      | 0                 | 0                    | 0  | 0  | 0  | 0  | 0  | 0 | 14 | 0  | 0  |                   |
|               |                      |                                        |                                        |                          | 0                   | 0                                      | 0                 | 0                    | 8  | 0  | 0  | 0  | 0  | 0 | 0  | 0  | 7  |                   |
|               | Agaricostilbomycetes | Agaricostilbales                       | Chionosphaeraceae                      | <i>Kurtzmanomyces</i>    | 1                   | 0                                      | 6                 | 0                    | 0  | 0  | 0  | 5  | 2  | 0 | 0  | 0  | 2  |                   |
|               |                      |                                        |                                        |                          |                     |                                        |                   |                      |    |    |    |    |    |   |    |    |    | <i>Occultifur</i> |
|               | Cystobasidiomycetes  | Cystobasidiales                        | Cystobasidiaceae                       | <i>Cystobasidium</i>     | 2                   | 0                                      | 0                 | 0                    | 2  | 2  | 0  | 0  | 0  | 7 | 0  | 4  |    |                   |
|               |                      |                                        |                                        |                          |                     | 0                                      | 0                 | 1                    | 1  | 3  | 0  | 1  | 3  | 0 | 0  | 3  | 3  |                   |
|               |                      | Cystobasidiomycetes_ord_Incertae_sedis | Buckleyzymaceae                        | <i>Buckleyzyma</i>       | 1                   | 0                                      | 0                 | 0                    | 0  | 5  | 1  | 0  | 0  | 0 | 0  | 7  | 2  |                   |
|               |                      |                                        |                                        |                          |                     | Cystobasidiomycetes_fam_Incertae_sedis | <i>Sakaguchia</i> | 2                    | 0  | 0  | 0  | 4  | 4  | 4 | 0  | 0  | 0  | 1                 |
|               | Exobasidiomycetes    | Erythrobasidiales                      | Erythrobasidiales_fam_Incertae_sedis   | <i>Erythrobasidium</i>   | 1                   | 0                                      | 0                 | 0                    | 0  | 0  | 0  | 0  | 0  | 0 | 0  | 16 | 0  |                   |
|               |                      |                                        |                                        |                          |                     | Entylomatales                          | Entylomataceae    | <i>Entyloma</i>      | 1  | 0  | 0  | 0  | 0  | 0 | 0  | 0  | 0  | 0                 |
|               |                      | Exobasidiomycetidae_ord_Incertae_sedis | Exobasidiomycetidae_fam_Incertae_sedis | <i>Tilletopsis</i>       | 1                   | 0                                      | 0                 | 0                    | 6  | 3  | 3  | 0  | 0  | 0 | 5  | 0  | 0  |                   |
|               |                      |                                        |                                        |                          |                     | Georgiefischeriales                    | Gjaerumiaceae     | <i>Gjaerumia</i>     | 1  | 0  | 0  | 0  | 17 | 0 | 0  | 0  | 0  | 0                 |
|               | Microbotryomycetes   | Microstromatales                       | Microstromataceae                      | <i>Microstroma</i>       | 2                   | 0                                      | 3                 | 1                    | 0  | 0  | 0  | 5  | 5  | 0 | 0  | 3  | 0  |                   |
|               |                      |                                        |                                        |                          |                     | 1                                      | 1                 | 13                   | 0  | 0  | 0  | 0  | 2  | 0 | 0  | 0  |    |                   |
|               |                      | Leucosporidiales                       | Leucosporidiaceae                      | <i>Mastigobasidium</i>   | 1                   | 0                                      | 0                 | 0                    | 17 | 0  | 0  | 0  | 0  | 0 | 0  | 0  | 0  |                   |
|               |                      |                                        |                                        |                          |                     | Microbotryales                         | Microbotryaceae   | <i>Sphacelotheca</i> | 1  | 0  | 0  | 0  | 0  | 0 | 0  | 0  | 2  | 0                 |
|               | Microbotryomycetes   | Sporidiobolales                        | Sporidiobolales_fam_Incertae_sedis     | <i>Sporobolomyces</i>    | 4                   | 0                                      | 0                 | 1                    | 0  | 8  | 1  | 0  | 1  | 0 | 1  | 5  | 1  |                   |
|               |                      |                                        |                                        |                          |                     | 1                                      | 4                 | 6                    | 0  | 0  | 0  | 0  | 1  | 3 | 0  | 3  | 0  |                   |
|               |                      |                                        |                                        |                          |                     | 0                                      | 0                 | 6                    | 0  | 0  | 0  | 4  | 0  | 9 | 0  | 0  | 0  |                   |
|               |                      |                                        |                                        |                          |                     | 0                                      | 0                 | 0                    | 0  | 19 | 0  | 0  | 0  | 0 | 0  | 0  | 0  |                   |
|               |                      |                                        |                                        | <i>Rhodotorula</i>       | 10                  | 5                                      | 1                 | 8                    | 0  | 0  | 0  | 0  | 3  | 0 | 0  | 0  | 1  | 1                 |
|               |                      |                                        |                                        |                          |                     | 0                                      | 0                 | 0                    | 5  | 5  | 0  | 0  | 0  | 0 | 0  | 0  | 1  | 8                 |
|               |                      |                                        |                                        |                          |                     | 0                                      | 0                 | 0                    | 0  | 0  | 0  | 0  | 0  | 0 | 0  | 0  | 2  | 17                |
|               |                      |                                        |                                        |                          |                     | 0                                      | 0                 | 0                    | 0  | 9  | 0  | 0  | 0  | 0 | 0  | 3  | 8  | 0                 |
|               |                      |                                        |                                        |                          |                     | 0                                      | 0                 | 0                    | 0  | 0  | 0  | 0  | 0  | 0 | 0  | 1  | 19 | 0                 |
|               |                      |                                        |                                        |                          |                     | 1                                      | 0                 | 10                   | 0  | 0  | 0  | 2  | 0  | 7 | 0  | 0  | 0  | 0                 |
|               |                      |                                        |                                        |                          |                     | 2                                      | 15                | 0                    | 0  | 0  | 0  | 3  | 0  | 0 | 0  | 0  | 1  | 0                 |
|               |                      |                                        |                                        |                          |                     | 0                                      | 0                 | 0                    | 3  | 0  | 3  | 0  | 0  | 0 | 14 | 1  | 0  | 0                 |
|               |                      |                                        |                                        |                          |                     | 3                                      | 0                 | 0                    | 0  | 0  | 18 | 0  | 0  | 0 | 0  | 0  | 0  | 0                 |
|               |                      |                                        |                                        |                          |                     | 4                                      | 0                 | 0                    | 0  | 0  | 0  | 0  | 0  | 0 | 0  | 4  | 5  | 8                 |
|               | Pucciniomycetes      | Pucciniales                            | Pucciniaceae                           | <i>Puccinia</i>          | 2                   | 0                                      | 0                 | 0                    | 15 | 7  | 0  | 0  | 0  | 0 | 0  | 0  | 0  |                   |
|               |                      |                                        |                                        |                          |                     | 0                                      | 0                 | 22                   | 0  | 0  | 0  | 0  | 0  | 0 | 0  | 0  |    |                   |
|               | Tremellomycetes      | Cystofilobasidiales                    | Cystofilobasidiaceae                   | <i>Udeniomyces</i>       | 1                   | 0                                      | 0                 | 0                    | 17 | 6  | 0  | 0  | 0  | 0 | 0  | 0  | 0  |                   |
|               |                      |                                        |                                        |                          |                     | <i>Phaffia</i>                         | 1                 | 1                    | 2  | 2  | 0  | 0  | 2  | 0 | 3  | 1  | 12 | 0                 |
|               |                      |                                        |                                        | <i>Cystofilobasidium</i> | 3                   | 0                                      | 0                 | 0                    | 23 | 0  | 0  | 0  | 0  | 0 | 0  | 1  | 0  |                   |
|               |                      |                                        |                                        |                          |                     | 0                                      | 0                 | 24                   | 0  | 0  | 0  | 0  | 0  | 0 | 0  | 0  | 0  | 0                 |
|               |                      | Tremellales                            | Tremellales_fam_Incertae_sedis         | Filobasidiaceae          | <i>Filobasidium</i> | 1                                      | 2                 | 5                    | 7  | 0  | 0  | 0  | 4  | 7 | 0  | 0  | 0  |                   |
|               |                      |                                        |                                        |                          |                     |                                        | Piskurozymaceae   | <i>Solicoccozyma</i> | 1  | 0  | 0  | 26 | 0  | 0 | 0  | 0  | 0  | 0                 |
|               |                      |                                        |                                        | <i>Tremella</i>          | 2                   | 0                                      | 0                 | 0                    | 1  | 0  | 1  | 0  | 0  | 0 | 9  | 8  | 8  |                   |
|               |                      |                                        |                                        |                          |                     | 0                                      | 0                 | 0                    | 0  | 0  | 0  | 0  | 0  | 0 | 0  | 5  | 22 |                   |
|               |                      |                                        |                                        | <i>Hannaella</i>         | 3                   | 0                                      | 0                 | 2                    | 1  | 6  | 6  | 1  | 0  | 0 | 1  | 8  | 2  |                   |
|               |                      |                                        |                                        |                          |                     | 0                                      | 0                 | 0                    | 25 | 0  | 0  | 0  | 0  | 0 | 0  | 0  | 2  | 0                 |
|               |                      |                                        |                                        | <i>Dioszegia</i>         | 1                   | 0                                      | 0                 | 2                    | 10 | 1  | 7  | 0  | 0  | 0 | 2  | 5  | 0  |                   |
|               |                      |                                        |                                        |                          |                     | 0                                      | 0                 | 0                    | 1  | 1  | 0  | 0  | 0  | 0 | 21 | 2  | 3  |                   |
|               |                      |                                        |                                        | <i>Cryptococcus</i>      | 5                   | 0                                      | 0                 | 0                    | 11 | 0  | 6  | 0  | 0  | 0 | 0  | 0  | 11 |                   |
|               |                      |                                        |                                        |                          |                     | 0                                      | 0                 | 0                    | 5  | 7  | 3  | 0  | 0  | 0 | 0  | 12 | 1  |                   |
|               |                      |                                        |                                        |                          |                     | 0                                      | 0                 | 0                    | 7  | 4  | 0  | 0  | 0  | 0 | 11 | 6  | 0  |                   |
|               |                      |                                        |                                        |                          |                     | 0                                      | 0                 | 0                    | 16 | 1  | 0  | 0  | 0  | 0 | 0  | 5  | 7  |                   |
|               |                      |                                        |                                        | <i>Bullera</i>           | 1                   | 0                                      | 0                 | 0                    | 3  | 3  | 7  | 0  | 0  | 0 | 9  | 6  | 2  |                   |
|               |                      |                                        |                                        |                          |                     | 0                                      | 0                 | 0                    | 0  | 0  | 0  | 0  | 0  | 4 | 5  | 12 | 9  |                   |
|               | Trichosporonales     | Trichosporonaceae                      | <i>Trichosporon</i>                    | 5                        | 0                   | 0                                      | 0                 | 0                    | 31 | 0  | 0  | 0  | 0  | 0 | 0  |    |    |                   |
|               |                      |                                        |                                        |                          | 0                   | 0                                      | 0                 | 9                    | 2  | 0  | 0  | 0  | 0  | 0 | 8  | 13 |    |                   |
|               |                      |                                        |                                        |                          | 0                   | 0                                      | 0                 | 0                    | 0  | 4  | 0  | 0  | 0  | 0 | 0  | 29 | 0  |                   |
|               |                      |                                        |                                        |                          | 0                   | 1                                      | 1                 | 12                   | 11 | 0  | 2  | 1  | 0  | 0 | 7  | 0  |    |                   |
|               | Ustilaginomycetes    | Urocystidales                          | Glomosporiaceae                        | <i>Glomosporium</i>      | 1                   | 0                                      | 0                 | 0                    | 34 | 1  | 0  | 0  | 0  | 0 | 1  | 0  | 0  |                   |
|               |                      |                                        |                                        |                          |                     | Anthracoideaceae                       | <i>Farysia</i>    | 1                    | 26 | 4  | 6  | 0  | 0  | 0 | 0  | 0  | 0  | 0                 |
|               |                      | Ustilaginales                          | Ustilaginaceae                         | <i>Ustilago</i>          | 1                   | 0                                      | 4                 | 0                    | 0  | 0  | 31 | 0  | 0  | 0 | 0  | 0  | 1  |                   |
|               |                      |                                        |                                        |                          |                     | <i>Sporisorium</i>                     | 2                 | 7                    | 0  | 16 | 0  | 15 | 0  | 0 | 0  | 0  | 0  | 0                 |
|               |                      |                                        |                                        | <i>Anthracosporia</i>    | 2                   | 0                                      | 0                 | 0                    | 2  | 0  | 0  | 0  | 0  | 0 | 0  | 34 | 2  |                   |
|               |                      |                                        |                                        |                          |                     | 0                                      | 0                 | 7                    | 11 | 0  | 0  | 1  | 0  | 0 | 0  | 5  | 14 |                   |

|  |                                       |                  |                                   |                          |    |    |    |    |     |    |    |    |    |    |    |    |    |   |    |
|--|---------------------------------------|------------------|-----------------------------------|--------------------------|----|----|----|----|-----|----|----|----|----|----|----|----|----|---|----|
|  |                                       |                  |                                   | <i>Extracellulolysis</i> | 2  | 0  | 0  | 38 | 0   | 0  | 0  | 0  | 0  | 0  | 0  | 0  | 0  | 0 | 0  |
|  | Ustilaginomycotina_cls_Incertae_sedis | Malasseziales    | Malasseziaceae                    | <i>Malassezia</i>        | 3  | 0  | 0  | 3  | 0   | 5  | 1  | 0  | 0  | 4  | 11 | 14 | 0  | 0 | 0  |
|  |                                       |                  |                                   |                          |    | 0  | 0  | 0  | 0   | 0  | 0  | 0  | 0  | 0  | 26 | 0  | 12 | 0 | 0  |
|  |                                       |                  |                                   |                          |    | 0  | 0  | 0  | 1   | 0  | 0  | 0  | 0  | 0  | 6  | 31 | 0  | 0 | 0  |
|  | Wallemiomycetes                       | Geminibasidiales | Geminibasidiaceae                 | <i>Geminibasidium</i>    | 3  | 0  | 0  | 0  | 0   | 8  | 6  | 0  | 0  | 0  | 0  | 24 | 1  | 0 | 0  |
|  |                                       |                  |                                   |                          |    | 3  | 0  | 10 | 0   | 0  | 0  | 20 | 8  | 0  | 0  | 0  | 0  | 0 | 0  |
|  |                                       |                  |                                   |                          |    | 7  | 0  | 1  | 6   | 0  | 1  | 1  | 0  | 0  | 24 | 1  | 0  | 0 | 0  |
|  |                                       | Wallemiales      | Wallemiaceae                      | <i>Wallemia</i>          | 4  | 0  | 0  | 0  | 0   | 0  | 34 | 0  | 0  | 0  | 6  | 1  | 0  | 0 | 0  |
|  |                                       |                  |                                   |                          |    | 0  | 0  | 0  | 0   | 0  | 0  | 0  | 0  | 0  | 0  | 25 | 17 | 0 | 0  |
|  |                                       |                  |                                   |                          |    | 0  | 0  | 0  | 0   | 5  | 0  | 0  | 0  | 0  | 29 | 5  | 3  | 0 | 0  |
|  |                                       |                  |                                   |                          |    | 0  | 2  | 7  | 3   | 0  | 0  | 0  | 0  | 0  | 0  | 1  | 30 | 0 | 0  |
|  |                                       | Lobulomycetales  | Lobulomycetaceae                  | <i>Lobulomyces</i>       | 3  | 1  | 12 | 7  | 3   | 3  | 0  | 3  | 0  | 12 | 1  | 0  | 1  | 0 | 0  |
|  |                                       |                  |                                   |                          |    | 2  | 5  | 2  | 3   | 1  | 4  | 6  | 0  | 1  | 5  | 3  | 11 | 0 | 0  |
|  |                                       |                  |                                   |                          |    | 0  | 0  | 2  | 17  | 4  | 1  | 0  | 0  | 2  | 0  | 18 | 0  | 0 | 0  |
|  |                                       | Olpidiales       | Olpidiaceae                       | <i>Olpidium</i>          | 4  | 5  | 3  | 6  | 0   | 5  | 3  | 13 | 2  | 7  | 0  | 0  | 0  | 0 | 0  |
|  |                                       |                  |                                   |                          |    | 3  | 0  | 0  | 3   | 0  | 0  | 0  | 0  | 0  | 30 | 6  | 3  | 0 | 0  |
|  |                                       |                  |                                   |                          |    | 2  | 4  | 4  | 6   | 4  | 9  | 3  | 1  | 2  | 0  | 10 | 0  | 0 | 0  |
|  |                                       |                  |                                   |                          |    | 1  | 3  | 1  | 10  | 0  | 10 | 0  | 0  | 0  | 4  | 3  | 13 | 0 | 0  |
|  |                                       |                  |                                   |                          |    | 1  | 5  | 19 | 1   | 6  | 2  | 2  | 4  | 2  | 0  | 1  | 2  | 0 | 0  |
|  |                                       |                  |                                   |                          |    | 0  | 0  | 0  | 0   | 6  | 0  | 0  | 0  | 0  | 22 | 12 | 6  | 0 | 0  |
|  |                                       |                  |                                   |                          |    | 0  | 0  | 0  | 35  | 5  | 0  | 0  | 0  | 0  | 0  | 6  | 0  | 0 | 0  |
|  |                                       |                  |                                   |                          |    | 0  | 0  | 8  | 2   | 0  | 0  | 0  | 2  | 0  | 29 | 5  | 0  | 0 | 0  |
|  |                                       |                  |                                   |                          |    | 0  | 0  | 0  | 3   | 0  | 21 | 0  | 0  | 0  | 8  | 3  | 11 | 0 | 0  |
|  |                                       |                  |                                   |                          |    | 0  | 0  | 0  | 3   | 8  | 15 | 0  | 0  | 0  | 0  | 11 | 10 | 0 | 0  |
|  |                                       |                  |                                   |                          |    | 0  | 0  | 0  | 0   | 0  | 0  | 0  | 0  | 0  | 37 | 0  | 11 | 0 | 0  |
|  |                                       |                  |                                   |                          |    | 0  | 0  | 0  | 45  | 4  | 0  | 0  | 0  | 0  | 0  | 0  | 0  | 0 | 0  |
|  |                                       |                  |                                   |                          |    | 0  | 0  | 0  | 50  | 0  | 0  | 0  | 0  | 0  | 0  | 0  | 0  | 0 | 0  |
|  |                                       |                  |                                   |                          |    | 0  | 0  | 0  | 39  | 5  | 0  | 0  | 0  | 0  | 0  | 6  | 0  | 0 | 0  |
|  |                                       |                  |                                   |                          |    | 0  | 0  | 0  | 0   | 0  | 0  | 0  | 0  | 0  | 0  | 0  | 0  | 0 | 51 |
|  |                                       |                  | Sonoraphlyctidaceae               | <i>Sonoraphlyctis</i>    | 1  | 0  | 0  | 0  | 0   | 0  | 0  | 0  | 1  | 1  | 44 | 5  | 0  | 0 | 0  |
|  |                                       |                  | Alphamycetaceae                   | <i>Betamyces</i>         | 1  | 0  | 0  | 0  | 28  | 6  | 0  | 0  | 0  | 0  | 0  | 14 | 3  | 0 | 0  |
|  |                                       |                  |                                   | <i>Angulomyces</i>       | 1  | 0  | 0  | 0  | 1   | 8  | 7  | 0  | 0  | 0  | 26 | 9  | 1  | 0 | 0  |
|  |                                       |                  |                                   |                          |    | 2  | 39 | 5  | 0   | 0  | 0  | 0  | 0  | 6  | 0  | 0  | 0  | 0 | 0  |
|  |                                       | Rhizophydiales   | Rhizophydiaceae                   | <i>Rhizophyidium</i>     | 3  | 15 | 11 | 0  | 0   | 0  | 0  | 9  | 9  | 5  | 0  | 1  | 3  | 0 | 0  |
|  |                                       |                  |                                   |                          |    | 0  | 0  | 3  | 2   | 17 | 13 | 1  | 0  | 2  | 0  | 10 | 5  | 0 | 0  |
|  |                                       |                  |                                   |                          |    | 4  | 7  | 32 | 0   | 0  | 0  | 6  | 5  | 0  | 0  | 0  | 0  | 0 | 0  |
|  |                                       |                  | Rhizophydiales_fam_Incertae_sedis | <i>Operculomyces</i>     | 2  | 0  | 4  | 4  | 8   | 6  | 0  | 7  | 4  | 4  | 0  | 8  | 9  | 0 | 0  |
|  |                                       |                  |                                   |                          |    | 0  | 0  | 0  | 7   | 0  | 10 | 0  | 0  | 0  | 20 | 14 | 3  | 0 | 0  |
|  |                                       |                  |                                   |                          |    | 0  | 0  | 12 | 0   | 9  | 2  | 0  | 0  | 21 | 0  | 12 | 0  | 0 | 0  |
|  |                                       |                  |                                   |                          |    | 0  | 0  | 0  | 0   | 47 | 4  | 0  | 0  | 0  | 0  | 6  | 0  | 0 | 0  |
|  |                                       |                  |                                   |                          |    | 0  | 0  | 0  | 5   | 4  | 0  | 0  | 0  | 0  | 44 | 5  | 0  | 0 | 0  |
|  |                                       |                  |                                   |                          |    | 0  | 1  | 1  | 15  | 16 | 7  | 0  | 0  | 0  | 17 | 5  | 0  | 0 | 0  |
|  |                                       |                  |                                   |                          |    | 0  | 0  | 0  | 11  | 51 | 0  | 0  | 0  | 0  | 0  | 0  | 0  | 0 | 0  |
|  |                                       |                  |                                   |                          |    | 0  | 0  | 2  | 0   | 0  | 0  | 0  | 52 | 10 | 0  | 0  | 0  | 0 | 0  |
|  |                                       |                  |                                   |                          |    | 0  | 0  | 0  | 47  | 0  | 1  | 0  | 0  | 0  | 0  | 16 | 0  | 0 | 0  |
|  |                                       |                  |                                   | <i>Powellomyces</i>      | 1  | 0  | 0  | 0  | 29  | 23 | 0  | 0  | 0  | 0  | 5  | 8  | 1  | 0 | 0  |
|  |                                       |                  |                                   | <i>Kochiomyces</i>       | 1  | 0  | 1  | 0  | 29  | 12 | 12 | 0  | 0  | 2  | 0  | 9  | 2  | 0 | 0  |
|  |                                       |                  | Acaulosporaceae                   | <i>Acaulospora</i>       | 2  | 0  | 0  | 0  | 61  | 6  | 0  | 0  | 0  | 0  | 0  | 0  | 0  | 0 | 0  |
|  |                                       |                  |                                   |                          |    | 0  | 3  | 0  | 12  | 26 | 4  | 0  | 0  | 0  | 2  | 6  | 15 | 0 | 0  |
|  |                                       |                  |                                   |                          |    | 0  | 0  | 0  | 0   | 64 | 4  | 1  | 0  | 0  | 0  | 0  | 0  | 0 | 0  |
|  |                                       |                  | Diversisporaceae                  | <i>Diversispora</i>      | 4  | 11 | 26 | 9  | 2   | 0  | 0  | 9  | 12 | 0  | 0  | 2  | 0  | 0 | 0  |
|  |                                       |                  |                                   |                          |    | 0  | 1  | 0  | 9   | 8  | 3  | 0  | 0  | 2  | 9  | 29 | 10 | 0 | 0  |
|  |                                       |                  |                                   |                          |    | 0  | 0  | 0  | 40  | 17 | 4  | 0  | 0  | 0  | 12 | 0  | 1  | 0 | 0  |
|  |                                       |                  |                                   |                          |    | 0  | 0  | 1  | 65  | 3  | 0  | 0  | 0  | 0  | 0  | 1  | 5  | 0 | 0  |
|  |                                       |                  |                                   | <i>Scutellospora</i>     | 2  | 1  | 6  | 2  | 22  | 2  | 11 | 4  | 2  | 3  | 0  | 24 | 1  | 0 | 0  |
|  |                                       |                  |                                   |                          |    | 9  | 11 | 20 | 0   | 0  | 16 | 0  | 0  | 22 | 0  | 0  | 0  | 0 | 0  |
|  |                                       |                  |                                   |                          |    | 3  | 1  | 7  | 23  | 22 | 7  | 7  | 0  | 1  | 5  | 3  | 0  | 0 | 0  |
|  |                                       |                  |                                   |                          |    | 0  | 0  | 0  | 20  | 23 | 23 | 0  | 0  | 0  | 6  | 8  | 1  | 0 | 0  |
|  |                                       |                  |                                   |                          |    | 1  | 1  | 0  | 72  | 6  | 1  | 0  | 0  | 0  | 1  | 4  | 2  | 0 | 0  |
|  |                                       |                  |                                   |                          |    | 0  | 0  | 0  | 0   | 31 | 4  | 7  | 0  | 0  | 40 | 0  | 6  | 0 | 0  |
|  |                                       |                  |                                   |                          |    | 0  | 0  | 0  | 14  | 16 | 18 | 0  | 0  | 0  | 0  | 3  | 39 | 0 | 0  |
|  |                                       |                  |                                   |                          |    | 5  | 27 | 11 | 2   | 0  | 2  | 18 | 4  | 10 | 2  | 3  | 7  | 0 | 0  |
|  |                                       |                  |                                   |                          |    | 2  | 1  | 0  | 12  | 0  | 20 | 0  | 0  | 2  | 0  | 20 | 35 | 0 | 0  |
|  |                                       |                  |                                   |                          |    | 0  | 0  | 0  | 2   | 3  | 21 | 0  | 0  | 2  | 38 | 14 | 14 | 0 | 0  |
|  |                                       |                  |                                   |                          |    | 0  | 15 | 27 | 0   | 0  | 0  | 33 | 15 | 5  | 0  | 0  | 0  | 0 | 0  |
|  |                                       |                  |                                   |                          |    | 44 | 5  | 18 | 0   | 0  | 0  | 7  | 0  | 23 | 0  | 0  | 0  | 0 | 0  |
|  |                                       |                  |                                   |                          |    | 0  | 0  | 0  | 4   | 0  | 76 | 0  | 0  | 0  | 0  | 18 | 3  | 0 | 0  |
|  |                                       |                  |                                   | <i>Gigaspora</i>         | 24 | 0  | 0  | 0  | 0   | 1  | 0  | 0  | 0  | 0  | 38 | 20 | 45 | 0 | 0  |
|  |                                       |                  |                                   |                          |    | 0  | 6  | 0  | 0   | 0  | 11 | 3  | 0  | 1  | 25 | 21 | 40 | 0 | 0  |
|  |                                       |                  |                                   |                          |    | 0  | 4  | 0  | 4   | 0  | 6  | 0  | 0  | 0  | 6  | 94 | 0  | 0 | 0  |
|  |                                       |                  | Gigasporaceae                     |                          |    | 0  | 0  | 0  | 114 | 0  | 0  | 0  | 0  | 0  | 0  | 1  | 0  | 0 | 0  |

|               |                |  |  |  |  |     |     |     |     |     |     |     |     |     |     |     |     |
|---------------|----------------|--|--|--|--|-----|-----|-----|-----|-----|-----|-----|-----|-----|-----|-----|-----|
| Glomeromycota | Glomeromycetes |  |  |  |  | 0   | 0   | 1   | 4   | 2   | 0   | 0   | 0   | 0   | 3   | 109 | 0   |
|               |                |  |  |  |  | 5   | 9   | 39  | 0   | 0   | 0   | 24  | 34  | 2   | 0   | 8   | 0   |
|               |                |  |  |  |  | 0   | 0   | 0   | 7   | 1   | 15  | 0   | 2   | 0   | 38  | 41  | 23  |
|               |                |  |  |  |  | 0   | 0   | 0   | 66  | 8   | 0   | 0   | 9   | 0   | 7   | 19  | 21  |
|               |                |  |  |  |  | 0   | 0   | 1   | 7   | 4   | 2   | 0   | 0   | 0   | 62  | 54  | 1   |
|               |                |  |  |  |  | 0   | 0   | 0   | 22  | 57  | 9   | 0   | 0   | 0   | 16  | 2   | 30  |
|               |                |  |  |  |  | 0   | 5   | 93  | 4   | 34  | 6   | 0   | 1   | 0   | 0   | 0   | 0   |
|               |                |  |  |  |  | 0   | 0   | 0   | 4   | 0   | 10  | 0   | 0   | 0   | 64  | 41  | 27  |
|               |                |  |  |  |  | 0   | 4   | 23  | 0   | 0   | 0   | 0   | 0   | 4   | 0   | 115 | 1   |
|               |                |  |  |  |  | 1   | 1   | 5   | 9   | 14  | 55  | 61  | 4   | 0   | 0   | 5   | 0   |
|               |                |  |  |  |  | 0   | 4   | 76  | 3   | 4   | 1   | 0   | 0   | 23  | 16  | 16  | 13  |
|               |                |  |  |  |  | 7   | 0   | 0   | 73  | 20  | 39  | 0   | 0   | 12  | 0   | 0   | 7   |
|               |                |  |  |  |  | 0   | 0   | 0   | 34  | 13  | 5   | 0   | 0   | 0   | 8   | 82  | 21  |
|               |                |  |  |  |  | 0   | 0   | 0   | 4   | 17  | 71  | 0   | 0   | 0   | 67  | 4   | 2   |
|               |                |  |  |  |  | 0   | 0   | 0   | 0   | 1   | 11  | 0   | 0   | 0   | 60  | 55  | 38  |
|               |                |  |  |  |  | 0   | 0   | 0   | 71  | 50  | 43  | 0   | 0   | 0   | 0   | 1   | 1   |
|               |                |  |  |  |  | 0   | 0   | 0   | 5   | 26  | 0   | 0   | 0   | 0   | 6   | 10  | 120 |
|               |                |  |  |  |  | 0   | 0   | 1   | 24  | 76  | 17  | 0   | 0   | 0   | 0   | 50  | 0   |
|               |                |  |  |  |  | 3   | 8   | 3   | 26  | 1   | 3   | 0   | 0   | 1   | 42  | 88  | 1   |
|               |                |  |  |  |  | 0   | 0   | 0   | 124 | 22  | 24  | 0   | 0   | 0   | 0   | 8   | 0   |
|               |                |  |  |  |  | 1   | 0   | 1   | 40  | 37  | 13  | 0   | 0   | 5   | 0   | 9   | 73  |
|               |                |  |  |  |  | 0   | 0   | 0   | 11  | 47  | 19  | 0   | 0   | 0   | 72  | 18  | 13  |
|               |                |  |  |  |  | 10  | 0   | 109 | 0   | 1   | 10  | 15  | 32  | 16  | 0   | 0   | 0   |
|               |                |  |  |  |  | 7   | 56  | 38  | 0   | 58  | 0   | 2   | 28  | 9   | 0   | 0   | 0   |
|               |                |  |  |  |  | 15  | 24  | 0   | 48  | 15  | 53  | 0   | 2   | 1   | 26  | 9   | 19  |
|               |                |  |  |  |  | 129 | 62  | 0   | 0   | 0   | 0   | 20  | 0   | 1   | 0   | 0   | 0   |
|               |                |  |  |  |  | 0   | 1   | 2   | 3   | 104 | 7   | 35  | 15  | 41  | 0   | 5   | 0   |
|               |                |  |  |  |  | 0   | 0   | 0   | 179 | 21  | 4   | 0   | 0   | 0   | 4   | 4   | 2   |
|               |                |  |  |  |  | 0   | 0   | 0   | 155 | 61  | 0   | 0   | 0   | 0   | 0   | 0   | 0   |
|               |                |  |  |  |  | 0   | 0   | 0   | 118 | 99  | 0   | 0   | 0   | 0   | 0   | 0   | 1   |
|               |                |  |  |  |  | 8   | 1   | 4   | 19  | 10  | 115 | 0   | 0   | 0   | 1   | 31  | 38  |
|               |                |  |  |  |  | 0   | 0   | 0   | 30  | 17  | 184 | 0   | 0   | 0   | 2   | 0   | 3   |
|               |                |  |  |  |  | 8   | 23  | 54  | 10  | 121 | 13  | 1   | 3   | 1   | 0   | 0   | 5   |
|               |                |  |  |  |  | 0   | 1   | 0   | 12  | 0   | 5   | 1   | 0   | 0   | 97  | 71  | 52  |
|               |                |  |  |  |  | 79  | 0   | 100 | 0   | 0   | 0   | 24  | 34  | 0   | 0   | 1   | 2   |
|               |                |  |  |  |  | 0   | 0   | 0   | 52  | 65  | 25  | 0   | 0   | 1   | 40  | 29  | 28  |
|               |                |  |  |  |  | 4   | 45  | 170 | 1   | 1   | 1   | 1   | 4   | 20  | 0   | 0   | 0   |
|               |                |  |  |  |  | 1   | 0   | 19  | 10  | 70  | 65  | 6   | 3   | 7   | 10  | 35  | 23  |
|               |                |  |  |  |  | 30  | 17  | 5   | 26  | 3   | 3   | 8   | 5   | 2   | 37  | 75  | 41  |
|               |                |  |  |  |  | 0   | 0   | 0   | 7   | 128 | 15  | 1   | 0   | 0   | 69  | 38  | 1   |
|               |                |  |  |  |  | 0   | 0   | 1   | 15  | 29  | 1   | 0   | 0   | 0   | 58  | 134 | 25  |
|               |                |  |  |  |  | 1   | 0   | 0   | 24  | 8   | 14  | 0   | 0   | 0   | 9   | 128 | 88  |
|               |                |  |  |  |  | 55  | 0   | 1   | 0   | 0   | 0   | 215 | 0   | 28  | 0   | 0   | 0   |
|               |                |  |  |  |  | 25  | 49  | 18  | 2   | 0   | 28  | 32  | 37  | 46  | 10  | 20  | 43  |
|               |                |  |  |  |  | 0   | 0   | 0   | 44  | 52  | 108 | 0   | 0   | 0   | 32  | 34  | 57  |
|               |                |  |  |  |  | 0   | 0   | 0   | 62  | 22  | 1   | 0   | 0   | 0   | 3   | 27  | 213 |
|               |                |  |  |  |  | 19  | 3   | 59  | 31  | 55  | 24  | 100 | 2   | 16  | 0   | 21  | 4   |
|               |                |  |  |  |  | 0   | 0   | 0   | 165 | 35  | 82  | 0   | 0   | 0   | 46  | 0   | 8   |
|               |                |  |  |  |  | 0   | 0   | 0   | 0   | 0   | 0   | 0   | 0   | 0   | 0   | 352 | 0   |
|               |                |  |  |  |  | 40  | 57  | 145 | 2   | 5   | 4   | 9   | 49  | 6   | 9   | 3   | 23  |
|               |                |  |  |  |  | 0   | 0   | 0   | 4   | 228 | 23  | 0   | 0   | 0   | 18  | 77  | 3   |
|               |                |  |  |  |  | 2   | 11  | 214 | 0   | 0   | 0   | 92  | 8   | 27  | 0   | 0   | 0   |
|               |                |  |  |  |  | 0   | 0   | 0   | 34  | 72  | 3   | 0   | 0   | 0   | 0   | 258 | 0   |
|               |                |  |  |  |  | 1   | 0   | 43  | 73  | 36  | 17  | 9   | 0   | 21  | 74  | 34  | 93  |
|               |                |  |  |  |  | 0   | 0   | 5   | 14  | 8   | 34  | 0   | 0   | 3   | 51  | 225 | 62  |
|               |                |  |  |  |  | 0   | 0   | 0   | 96  | 26  | 2   | 0   | 0   | 0   | 2   | 10  | 267 |
|               |                |  |  |  |  | 0   | 0   | 0   | 2   | 20  | 4   | 0   | 0   | 0   | 252 | 36  | 93  |
|               |                |  |  |  |  | 0   | 0   | 2   | 146 | 22  | 60  | 0   | 1   | 10  | 70  | 38  | 71  |
|               |                |  |  |  |  | 1   | 2   | 0   | 151 | 20  | 56  | 5   | 2   | 1   | 40  | 60  | 89  |
|               |                |  |  |  |  | 0   | 0   | 0   | 13  | 36  | 98  | 1   | 0   | 4   | 239 | 23  | 29  |
|               |                |  |  |  |  | 6   | 426 | 12  | 0   | 0   | 0   | 0   | 0   | 6   | 6   | 0   | 0   |
|               |                |  |  |  |  | 10  | 6   | 162 | 80  | 20  | 18  | 53  | 58  | 39  | 7   | 3   | 6   |
|               |                |  |  |  |  | 0   | 0   | 13  | 34  | 5   | 17  | 14  | 19  | 10  | 39  | 135 | 183 |
|               |                |  |  |  |  | 3   | 37  | 66  | 1   | 33  | 0   | 21  | 199 | 79  | 6   | 25  | 10  |
|               |                |  |  |  |  | 0   | 4   | 0   | 16  | 137 | 6   | 0   | 0   | 0   | 105 | 151 | 91  |
|               |                |  |  |  |  | 0   | 56  | 10  | 39  | 154 | 44  | 15  | 0   | 1   | 31  | 88  | 80  |
|               |                |  |  |  |  | 0   | 0   | 0   | 487 | 6   | 31  | 0   | 0   | 0   | 4   | 1   | 0   |
|               |                |  |  |  |  | 0   | 0   | 0   | 4   | 0   | 0   | 0   | 0   | 0   | 16  | 516 | 0   |
|               |                |  |  |  |  | 0   | 0   | 0   | 11  | 397 | 0   | 0   | 0   | 0   | 10  | 99  | 21  |
|               |                |  |  |  |  | 1   | 1   | 25  | 157 | 11  | 5   | 0   | 0   | 337 | 12  | 0   | 20  |
|               |                |  |  |  |  | 6   | 10  | 34  | 56  | 136 | 93  | 7   | 29  | 6   | 59  | 61  | 80  |
