# Supplementary material for: Effect of Low-Input Organic and Conventional Farming Systems on Maize Rhizosphere in Two Portuguese Open-Pollinated Varieties (OPV), “Pigarro” (Improved Landrace) and “SinPre” (a Composite Cross Population)
Source: PubMed Central journal article supplement (PMC7953162; doi:10.3389/fmicb.2021.636009), 2021-02-26
Supplement: Table_5.pdf [file Table_5.pdf]

# Effect of Low Input Organic and Conventional farming systems on maize rhizosphere in two Portuguese OPV, ‘Pigarro’ (improved landrace) and ‘SinPre’ (a Composite Cross Population)

Aitana Ares, Joana Costa\*, Carolina Joaquim, Duarte Pintado, Daniela Santos, Monika M. Messmer, Pedro Mendes-Moreira

\* Correspondence: Corresponding Author: jcosta@uc.pt

**Supplementary Table 5.** Fungal and bacterial core rhizosphere microbiota associated with maize.

| <b>Fungal core microbiota</b> | <b>Bacterial core microbiota</b> |
|-------------------------------|----------------------------------|
| <i>Acremonium</i>             | <i>Candidatus Koribacter</i>     |
| <i>Acrocalymma</i>            | <i>Candidatus Solibacter</i>     |
| <i>Actinomucor</i>            | <i>Edaphobacter</i>              |
| <i>Alternaria</i>             | <i>Actinoallomurus</i>           |
| <i>Anthracycystis</i>         | <i>Actinocorallia</i>            |
| <i>Arthrographis</i>          | <i>Actinokineospora</i>          |
| <i>Aspergillus</i>            | <i>Actinomadura</i>              |
| <i>Auxarthron</i>             | <i>Actinomycetospora</i>         |
| <i>Beauveria</i>              | <i>Actinoplanes</i>              |
| <i>Bullera</i>                | <i>Actinopolymorpha</i>          |
| <i>Candida</i>                | <i>Aeromicrobium</i>             |
| <i>Cercophora</i>             | <i>Agromyces</i>                 |
| <i>Chaetomium</i>             | <i>Amycolatopsis</i>             |
| <i>Chaetosphaeria</i>         | <i>Arthrobacter</i>              |
| <i>Chloridium</i>             | <i>Catellatospora</i>            |
| <i>Chrysosporium</i>          | <i>Cellulomonas</i>              |
| <i>Chytridiomycota</i>        | <i>Cellulosimicrobium</i>        |
| <i>Cladophialophora</i>       | <i>Conexibacter</i>              |
| <i>Cladorrhinum</i>           | <i>Cryocola</i>                  |
| <i>Cladosporium</i>           | <i>Curtobacterium</i>            |
| <i>Claroideoglossum</i>       | <i>Dactylosporangium</i>         |
| <i>Clonostachys</i>           | <i>Frankia</i>                   |
| <i>Coniochaeta</i>            | <i>Friedmanniella</i>            |
| <i>Conlarium</i>              | <i>Geodermatophilus</i>          |
| <i>Coprinopsis</i>            | <i>Georgenia</i>                 |
| <i>Cryptococcus</i>           | <i>Glycomyces</i>                |
| <i>Cunninghamella</i>         | <i>Gordonia</i>                  |
| <i>Cystofilobasidium</i>      | <i>Iamia</i>                     |
| <i>Diaporthe</i>              | <i>Kibdelosporangium</i>         |
| <i>Drechslera</i>             | <i>Kribbella</i>                 |
| <i>Exophiala</i>              | <i>Kutzneria</i>                 |
| <i>Funneliformis</i>          | <i>Lentzea</i>                   |
| <i>Fusarium</i>               | <i>Microbacterium</i>            |
| <i>Fusicolla</i>              | <i>Microbispora</i>              |

|                         |                                   |
|-------------------------|-----------------------------------|
| <i>Ganoderma</i>        | <i>Microgynium</i>                |
| <i>Gibberella</i>       | <i>Modestobacter</i>              |
| <i>Gigaspora</i>        | <i>Mycobacterium</i>              |
| <i>Glomeromycota</i>    | <i>Nocardia</i>                   |
| <i>Gongronella</i>      | <i>Nocardioidea</i>               |
| <i>Gymnopilus</i>       | <i>Nonomuraea</i>                 |
| <i>Hypholoma</i>        | <i>Phycococcus</i>                |
| <i>Lasiosphaeria</i>    | <i>Pilimelia</i>                  |
| <i>Lecanicillium</i>    | <i>Pimelobacter</i>               |
| <i>Lipomyces</i>        | <i>Pseudonocardia</i>             |
| <i>Malassezia</i>       | <i>Rhodococcus</i>                |
| <i>Mastigobasidium</i>  | <i>Saccharopolyspora</i>          |
| <i>Metacordyceps</i>    | <i>Saccharothrix</i>              |
| <i>Metarhizium</i>      | <i>Salinibacterium</i>            |
| <i>Microascus</i>       | <i>Solirubrobacter</i>            |
| <i>Microdochium</i>     | <i>Sphaerisporangium</i>          |
| <i>Minimedusa</i>       | <i>Sporichthya</i>                |
| <i>Monographella</i>    | <i>Streptacidiphilus</i>          |
| <i>Mortierella</i>      | <i>Streptomyces</i>               |
| <i>Mucor</i>            | <i>Streptosporangium</i>          |
| <i>Myrothecium</i>      | <i>Terracoccus</i>                |
| <i>Ochroconis</i>       | <i>Virgisporangium</i>            |
| <i>Oidiodendron</i>     | <i>Xylanimicrobium</i>            |
| <i>Paecilomyces</i>     | <i>Fimbriimonas</i>               |
| <i>Papiliotrema</i>     | <i>Adhaeribacter</i>              |
| <i>Parascedosporium</i> | <i>Candidatus Amoebophilus</i>    |
| <i>Penicillium</i>      | <i>Chitinophaga</i>               |
| <i>Phallus</i>          | <i>Chryseobacterium</i>           |
| <i>Pisolithus</i>       | <i>Dyadobacter</i>                |
| <i>Podospora</i>        | <i>Flavisolibacter</i>            |
| <i>Powellomyces</i>     | <i>Flavobacterium</i>             |
| <i>Puccinia</i>         | <i>Fluviicola</i>                 |
| <i>Purpureocillium</i>  | <i>Hymenobacter</i>               |
| <i>Pyrenochaeta</i>     | <i>Niastella</i>                  |
| <i>Rhizophlyctis</i>    | <i>Olivibacter</i>                |
| <i>Rhizopus</i>         | <i>Pedobacter</i>                 |
| <i>Rhodotorula</i>      | <i>Pontibacter</i>                |
| <i>Saccharomyces</i>    | <i>Rhodocytophaga</i>             |
| <i>Scolecobasidium</i>  | <i>Segetibacter</i>               |
| <i>Scopulariopsis</i>   | <i>Sphingobacterium</i>           |
| <i>Scytalidium</i>      | <i>Sporocytophaga</i>             |
| <i>Spizellomyces</i>    | <i>Candidatus Protochlamydia</i>  |
| <i>Sporobolomyces</i>   | <i>Candidatus Rhabdochlamydia</i> |
| <i>Sporothrix</i>       | <i>Parachlamydia</i>              |
| <i>Stachybotrys</i>     | <i>Caldilinea</i>                 |
| <i>Staphylotrichum</i>  | <i>Kouleothrix</i>                |
| <i>Suillus</i>          | <i>Candidatus Nitrososphaera</i>  |
| <i>Talaromyces</i>      | <i>Alicyclobacillus</i>           |
| <i>Trichoderma</i>      | <i>Alkaliphilus</i>               |
| <i>Umbelopsis</i>       | <i>Ammoniphilus</i>               |

|                     |                          |
|---------------------|--------------------------|
| <i>Ustilago</i>     | <i>Bacillus</i>          |
| <i>Veronaeopsis</i> | <i>Brevibacillus</i>     |
| <i>Waitea</i>       | <i>Caloramator</i>       |
|                     | <i>Clostridium</i>       |
|                     | <i>Cohnella</i>          |
|                     | <i>Coprococcus</i>       |
|                     | <i>Lysinibacillus</i>    |
|                     | <i>Paenibacillus</i>     |
|                     | <i>Pelosinus</i>         |
|                     | <i>Planifilum</i>        |
|                     | <i>Rummeliibacillus</i>  |
|                     | <i>Sediminibacterium</i> |
|                     | <i>Shimazuella</i>       |
|                     | <i>Solibacillus</i>      |
|                     | <i>Sporosarcina</i>      |
|                     | <i>Streptococcus</i>     |
|                     | <i>Symbiobacterium</i>   |
|                     | <i>Tepidimicrobium</i>   |
|                     | <i>Turcibacter</i>       |
|                     | <i>Nitrospira</i>        |
|                     | <i>A17</i>               |
|                     | <i>Gemmata</i>           |
|                     | <i>Pirellula</i>         |
|                     | <i>Planctomyces</i>      |
|                     | <i>Achromobacter</i>     |
|                     | <i>Acinetobacter</i>     |
|                     | <i>Ajifella</i>          |
|                     | <i>Agrobacterium</i>     |
|                     | <i>Amaricoccus</i>       |
|                     | <i>Aquicella</i>         |
|                     | <i>Arthrospira</i>       |
|                     | <i>Asticcacaulis</i>     |
|                     | <i>Balneimonas</i>       |
|                     | <i>Bdellovibrio</i>      |
|                     | <i>Bosea</i>             |
|                     | <i>Bradyrhizobium</i>    |
|                     | <i>Burkholderia</i>      |
|                     | <i>Caulobacter</i>       |
|                     | <i>Cellvibrio</i>        |
|                     | <i>Chelatococcus</i>     |
|                     | <i>Cupriavidus</i>       |
|                     | <i>Devosia</i>           |
|                     | <i>Dokdonella</i>        |
|                     | <i>Erwinia</i>           |
|                     | <i>Geobacter</i>         |
|                     | <i>Hyphomicrobium</i>    |
|                     | <i>Inquilineus</i>       |
|                     | <i>Janthinobacterium</i> |
|                     | <i>Kaistia</i>           |
|                     | <i>Kaistobacter</i>      |

|                                     |
|-------------------------------------|
| <i>Labrys</i>                       |
| <i>Limnohabitans</i>                |
| <i>Luteibacter</i>                  |
| <i>Luteimonas</i>                   |
| <i>Lysobacter</i>                   |
| <i>Mesorhizobium</i>                |
| <i>Methylibium</i>                  |
| <i>Methylobacterium</i>             |
| <i>Mycoplana</i>                    |
| <i>Myxococcus</i>                   |
| <i>Nannocystis</i>                  |
| <i>Nitrosovibrio</i>                |
| <i>Novosphingobium</i>              |
| <i>Ochrobactrum</i>                 |
| <i>Oxalobacter</i>                  |
| <i>Pedomicrobium</i>                |
| <i>Phaeospirillum</i>               |
| <i>Phenyllobacterium</i>            |
| <i>Phyllobacterium</i>              |
| <i>Plesiocystis</i>                 |
| <i>Pseudomonas</i>                  |
| <i>Pseudoxanthomonas</i>            |
| <i>Ramlibacter</i>                  |
| <i>Rhizobium</i>                    |
| <i>Rhodobacter</i>                  |
| <i>Rhodoferax</i>                   |
| <i>Rhodoplanes</i>                  |
| <i>Roseococcus</i>                  |
| <i>Rubellimicrobium</i>             |
| <i>Skermanella</i>                  |
| <i>Sorangium</i>                    |
| <i>Sphingobium</i>                  |
| <i>Sphingomonas</i>                 |
| <i>Sphingopyxis</i>                 |
| <i>Stenotrophomonas</i>             |
| <i>Steroidobacter</i>               |
| <i>Thermomonas</i>                  |
| <i>Variovorax</i>                   |
| <i>Deinococcus</i>                  |
| <i>Candidatus Xiphinematobacter</i> |
| <i>Chthoniobacter</i>               |
| <i>DA101</i>                        |
| <i>Ellin506</i>                     |
| <i>heteroC45_4W</i>                 |
| <i>Luteolibacter</i>                |
| <i>Opitutus</i>                     |
| <i>OR-59</i>                        |
| <i>Pedosphaera</i>                  |
| <i>Prostheco bacter</i>             |
