# Supplementary material for: Effect of Low-Input Organic and Conventional Farming Systems on Maize Rhizosphere in Two Portuguese Open-Pollinated Varieties (OPV), “Pigarro” (Improved Landrace) and “SinPre” (a Composite Cross Population)
Source: PubMed Central journal article supplement (PMC7953162; doi:10.3389/fmicb.2021.636009), 2021-02-26
Supplement: Table_6.pdf [file Table_6.pdf]

## Effect of Low Input Organic and Conventional farming systems on maize rhizosphere in two Portuguese OPV, ‘Pigarro’ (improved landrace) and ‘SinPre’ (a Composite Cross Population)

Aitana Ares, Joana Costa\*, Carolina Joaquim, Duarte Pintado, Daniela Santos, Monika M. Messmer, Pedro Mendes-Moreira

\* Correspondence: Corresponding Author: jcosta@uc.pt

**Supplementary Table 6.** Fungal and bacterial genera specific to the rhizosphere microbiota in each population.

| Fungal Genera           |                         | Bacterial Genera          |                                   |
|-------------------------|-------------------------|---------------------------|-----------------------------------|
| SinPre                  | Pigarro                 | SinPre                    | Pigarro                           |
| <i>Armillaria</i>       | <i>Abortiporus</i>      | <i>JG37-AG-70</i>         | <i>Acanthamoeba</i>               |
| <i>Ascobolus</i>        | <i>Agaricus</i>         | <i>Azoarcus</i>           | <i>Aminobacter</i>                |
| <i>Athelia</i>          | <i>Agrocybe</i>         | <i>Crenothrix</i>         | <i>Anaerobacillus</i>             |
| <i>Barnettozyma</i>     | <i>Amphinema</i>        | <i>Haliangium</i>         | <i>Anaerolinea</i>                |
| <i>Berkleasium</i>      | <i>Angulomyces</i>      | <i>Legionella</i>         | <i>B-42</i>                       |
| <i>Brevicellicium</i>   | <i>Buergenerula</i>     | <i>Magnetospirillum</i>   | <i>Chroococcidiopsis</i>          |
| <i>Calcarisporiella</i> | <i>Cladoriella</i>      | <i>Methanosaeta</i>       | <i>Chthonomonas</i>               |
| <i>Cercospora</i>       | <i>Clathrus</i>         | <i>Oscillochloris</i>     | <i>Citrobacter</i>                |
| <i>Chalastospora</i>    | <i>Cosmospora</i>       | <i>Rudanella</i>          | <i>Corynebacterium</i>            |
| <i>Chlorophyllum</i>    | <i>Echinoderma</i>      | <i>Sedimentibacter</i>    | <i>Coxiella</i>                   |
| <i>Circinella</i>       | <i>Exserohilum</i>      | <i>Solitalea</i>          | <i>Dietzia</i>                    |
| <i>Coemansia</i>        | <i>Gliomastix</i>       | <i>Sporanaerobacter</i>   | <i>Elizabethkingia</i>            |
| <i>Cyathus</i>          | <i>Glomosporium</i>     | <i>Uliginosibacterium</i> | <i>Gracilibacillus</i>            |
| <i>Dactylaria</i>       | <i>Hydnum</i>           |                           | <i>Halorhodospira</i>             |
| <i>Efibulobasidium</i>  | <i>Kodamaea</i>         |                           | <i>Leadbetterella</i>             |
| <i>Farysia</i>          | <i>Lepista</i>          |                           | <i>Methanosarcina</i>             |
| <i>Geomyces</i>         | <i>Microstroma</i>      |                           | <i>Methylophaga</i>               |
| <i>Gjaerumia</i>        | <i>Occultifur</i>       |                           | <i>Natronincola Anaerovirgula</i> |
| <i>Hebeloma</i>         | <i>Paralepista</i>      |                           | <i>Pelotomaculum</i>              |
| <i>Kochiomyces</i>      | <i>Pholiota</i>         |                           | <i>Perlucidibaca</i>              |
| <i>Kurtzmanomyces</i>   | <i>Pithoascus</i>       |                           | <i>Pigmentiphaga</i>              |
| <i>Lichtheimia</i>      | <i>Pleurostoma</i>      |                           | <i>Rathayibacter</i>              |
| <i>Lycoperdon</i>       | <i>Polyschema</i>       |                           | <i>Salinispora</i>                |
| <i>Madurella</i>        | <i>Pringsheimia</i>     |                           | <i>Tatlockia</i>                  |
| <i>Omphalotus</i>       | <i>Protomyces</i>       |                           | <i>Thermobifida</i>               |
| <i>Paraconiothyrium</i> | <i>Psathyrella</i>      |                           | <i>Thermovenabulum</i>            |
| <i>Peniophora</i>       | <i>Saccharomycopsis</i> |                           | <i>Virgibacillus</i>              |
| <i>Petriella</i>        | <i>Skeletocutis</i>     |                           |                                   |
| <i>Phaffia</i>          | <i>Sphacelotheca</i>    |                           |                                   |
| <i>Pleurotheciella</i>  | <i>Sphaerobolus</i>     |                           |                                   |
| <i>Pluteus</i>          | <i>Steccherinum</i>     |                           |                                   |
| <i>Ramicandelaber</i>   | <i>Stylonectria</i>     |                           |                                   |
| <i>Rectifusarium</i>    | <i>Taphrina</i>         |                           |                                   |
| <i>Rhizoctonia</i>      | <i>Tomentella</i>       |                           |                                   |
| <i>Rigidoporus</i>      | <i>Torulaspota</i>      |                           |                                   |
| <i>Scleroderma</i>      | <i>Tulostoma</i>        |                           |                                   |
| <i>Sclerotinia</i>      | <i>Verrucaria</i>       |                           |                                   |
| <i>Septoglomus</i>      |                         |                           |                                   |
| <i>Serendipita</i>      |                         |                           |                                   |
| <i>Tilletiopsis</i>     |                         |                           |                                   |
| <i>Trichophyton</i>     |                         |                           |                                   |
| <i>Volutella</i>        |                         |                           |                                   |
| <i>Wickerhamomyces</i>  |                         |                           |                                   |
