# Supplementary material for: Effect of Low-Input Organic and Conventional Farming Systems on Maize Rhizosphere in Two Portuguese Open-Pollinated Varieties (OPV), “Pigarro” (Improved Landrace) and “SinPre” (a Composite Cross Population)
Source: PubMed Central journal article supplement (PMC7953162; doi:10.3389/fmicb.2021.636009), 2021-02-26
Supplement: Table_7.pdf [file Table_7.pdf]

**Effect of Low Input Organic and Conventional farming systems on maize rhizosphere in two Portuguese OPV, ‘Pigarró’ (improved landrace) and ‘SinPre’ (a Composite Cross Population)**

Aitana Ares, Joana Costa\*, Carolina Joaquim, Duarte Pintado, Daniela Santos, Monika M. Messmer, Pedro Mendes-Moreira

\* Correspondence: Corresponding Author: jcosta@uc.pt

**Supplementary Table 7.** Genera relative abundance significantly different between ‘Pigarró’ and ‘SinPre’ populations ( $P < 0.05$ ).

| Genera                              | Difference |          |
|-------------------------------------|------------|----------|
|                                     | Pigarró    | SinPre   |
| <i>Abortiporus - Alternaria</i>     | -1233,5    | -1406,67 |
| <i>Abortiporus - Aspergillus</i>    | -1199,83   | -2969,67 |
| <i>Abortiporus - Fusarium</i>       | -2897,83   | -1764,33 |
| <i>Abortiporus - Mortierella</i>    | -2368,33   | -1928,67 |
| <i>Abortiporus - Oidiodendron</i>   | -4830,5    | -        |
| <i>Abortiporus - Penicillium</i>    | -1458,67   | -893,667 |
| <i>Abortiporus - Podospora</i>      | -1033,67   | -780,5   |
| <i>Abortiporus - Rhizophlyctis</i>  | -1673,83   | -1569,83 |
| <i>Abortiporus - Rhizopus</i>       | -3952,67   | -        |
| <i>Abortiporus - Dentiscutata</i>   | -          | -546,833 |
| <i>Abortiporus - Exophiala</i>      | -          | -723,5   |
| <i>Abortiporus - Microdochium</i>   | -          | -703,5   |
| <i>Abortiporus - Olpidium</i>       | -          | -667,5   |
| <i>Abortiporus - Cunninghamella</i> | -          | -679,5   |
| <i>Acaulospora - Alternaria</i>     | -1232,83   | -1406,67 |
| <i>Acaulospora - Aspergillus</i>    | -1199,17   | -2969,67 |
| <i>Acaulospora - Fusarium</i>       | -2897,17   | -1764,33 |
| <i>Acaulospora - Mortierella</i>    | -2367,67   | -1928,67 |
| <i>Acaulospora - Oidiodendron</i>   | -4829,83   | -        |
| <i>Acaulospora - Penicillium</i>    | -1458      | -893,667 |
| <i>Acaulospora - Podospora</i>      | -1033      | -780,5   |
| <i>Acaulospora - Rhizophlyctis</i>  | -1673,17   | -1569,83 |
| <i>Acaulospora - Rhizopus</i>       | -3952      | -        |
| <i>Acaulospora - Cunninghamella</i> | -          | -679,5   |
| <i>Acaulospora - Dentiscutata</i>   | -          | -546,833 |
| <i>Acaulospora - Exophiala</i>      | -          | -723,5   |
| <i>Acaulospora - Microdochium</i>   | -          | -703,5   |
| <i>Acaulospora - Olpidium</i>       | -          | -667,5   |
| <i>Acremonium - Fusarium</i>        | -2669,67   | -1512,5  |
| <i>Acremonium - Penicillium</i>     | -1230,5    | -641,833 |
| <i>Acremonium - Rhizophlyctis</i>   | -1445,67   | -1318    |
| <i>Acremonium - Rhizopus</i>        | -3724,5    | -        |
| <i>Acremonium - Alternaria</i>      | -          | -1154,83 |
| <i>Acremonium - Aspergillus</i>     | -          | -2717,83 |
| <i>Acremonium - Mortierella</i>     | -          | -1676,83 |
| <i>Acrocalymma - Alternaria</i>     | -1124,5    | -        |
| <i>Acrocalymma - Aspergillus</i>    | -1090,83   | -2882,83 |
| <i>Acrocalymma - Fusarium</i>       | -2788,83   | -1677,5  |
| <i>Acrocalymma - Mortierella</i>    | -2259,33   | -1841,83 |
| <i>Acrocalymma - Oidiodendron</i>   | -4721,5    | -        |
| <i>Acrocalymma - Penicillium</i>    | -1349,67   | -806,833 |
| <i>Acrocalymma - Rhizophlyctis</i>  | -1564,83   | -1483    |
| <i>Acrocalymma - Rhizopus</i>       | -3843,67   | -1319,83 |
| <i>Acrocalymma - Cunninghamella</i> | -          | -592,667 |
| <i>Acrocalymma - Exophiala</i>      | -          | -636,667 |
| <i>Acrocalymma - Microdochium</i>   | -          | -616,667 |
| <i>Acrocalymma - Olpidium</i>       | -          | -580,667 |
| <i>Acrocalymma - Podospora</i>      | -          | -693,667 |
