# Supplementary material for: Effect of Low-Input Organic and Conventional Farming Systems on Maize Rhizosphere in Two Portuguese Open-Pollinated Varieties (OPV), “Pigarro” (Improved Landrace) and “SinPre” (a Composite Cross Population)
Source: PubMed Central journal article supplement (PMC7953162; doi:10.3389/fmicb.2021.636009), 2021-02-26
Supplement: Table_8.pdf [file Table_8.pdf]

## Effect of Low Input Organic and Conventional farming systems on maize rhizosphere in two Portuguese OPV, ‘Pigarro’ (improved landrace) and ‘SinPre’ (a Composite Cross Population)

Aitana Ares, Joana Costa\*, Carolina Joaquim, Duarte Pintado, Daniela Santos, Monika M. Messmer, Pedro Mendes-Moreira

\* Correspondence: Corresponding Author: jcosta@uc.pt

**Supplementary Table 8.** Fungal and bacterial genera specific to the rhizosphere microbiota of maize in distinct farming system.

| Fungal Genera           |                         | Bacterial Genera                |                                   |
|-------------------------|-------------------------|---------------------------------|-----------------------------------|
| Conventional            | Organic                 | Conventional                    | Organic                           |
| <i>Agaricus</i>         | <i>Abortiporus</i>      | <i>Actinotalea</i>              | <i>Acanthamoeba</i>               |
| <i>Armillaria</i>       | <i>Acaulospora</i>      | <i>Azoarcus</i>                 | <i>Aminobacter</i>                |
| <i>Ascobolus</i>        | <i>Acrostalagmus</i>    | <i>B-42</i>                     | <i>Anaerobacillus</i>             |
| <i>Barnettozyma</i>     | <i>Agrocybe</i>         | <i>Brevundimonas</i>            | <i>Anaerovorax</i>                |
| <i>Basidiobolus</i>     | <i>Amphinema</i>        | <i>Candidatus Entotheonella</i> | <i>Anoxybacillus</i>              |
| <i>Brachyphoris</i>     | <i>Angulomyces</i>      | <i>Chloronema</i>               | <i>Blastochloris</i>              |
| <i>Brevicellicium</i>   | <i>Arachnomyces</i>     | <i>Citrobacter</i>              | <i>Chroococcidiopsis</i>          |
| <i>Chalastospora</i>    | <i>Articulospora</i>    | <i>Coxiella</i>                 | <i>Corynebacterium</i>            |
| <i>Chlorophyllum</i>    | <i>Athelia</i>          | <i>Dermacoccus</i>              | <i>Crenothrix</i>                 |
| <i>Cosmospora</i>       | <i>Betamyces</i>        | <i>Exiguobacterium</i>          | <i>Dechloromonas</i>              |
| <i>Daldinia</i>         | <i>Bovista</i>          | <i>Haliangium</i>               | <i>Demequina</i>                  |
| <i>Lectera</i>          | <i>Buckleyzyma</i>      | <i>Halorhodospira</i>           | <i>Desulfosporosinus</i>          |
| <i>Lepista</i>          | <i>Buergenerula</i>     | <i>Kineococcus</i>              | <i>Desulfotomaculum</i>           |
| <i>Paraconiothyrium</i> | <i>Calcarisporiella</i> | <i>Nitrosococcus</i>            | <i>Dietzia</i>                    |
| <i>Paralepista</i>      | <i>Cercospora</i>       | <i>Oscillochloris</i>           | <i>Emticicia</i>                  |
| <i>Peniophora</i>       | <i>Cetraspora</i>       | <i>Paenisporosarcina</i>        | <i>Flaviumibacter</i>             |
| <i>Piriformospora</i>   | <i>Circinella</i>       | <i>Parapedobacter</i>           | <i>Gracilibacillus</i>            |
| <i>Pluteus</i>          | <i>Cladoriella</i>      | <i>Parvibaculum</i>             | <i>Gracilibacter</i>              |
| <i>Rectifusarium</i>    | <i>Clathrus</i>         | <i>Ralstonia</i>                | <i>JG37-AG-70</i>                 |
| <i>Rigidoporus</i>      | <i>Coemansia</i>        | <i>Rathayibacter</i>            | <i>Larkinella</i>                 |
| <i>Septoglopus</i>      | <i>Conocybe</i>         | <i>Rickettsia</i>               | <i>Leadbetterella</i>             |
| <i>Sonoraphlyctis</i>   | <i>Cryptococcus</i>     | <i>Rubricoccus</i>              | <i>Lutispora</i>                  |
| <i>Sphaerobolus</i>     | <i>Cyathus</i>          | <i>Sinomonas</i>                | <i>Magnetospirillum</i>           |
| <i>Thielavia</i>        | <i>Cyphellophora</i>    | <i>Sporomusa</i>                | <i>Methanosaeta</i>               |
| <i>Volutella</i>        | <i>Dactylaria</i>       | <i>Tatlockia</i>                | <i>Methanosarcina</i>             |
|                         | <i>Dactylonectria</i>   | <i>Tsukamurella</i>             | <i>Methylophaga</i>               |
|                         | <i>Debaryomyces</i>     | <i>Uliginosibacterium</i>       | <i>Mycetocola</i>                 |
|                         | <i>Dentiscutata</i>     | <i>Yonghaparkia</i>             | <i>Natronincola Anaerovirgula</i> |
|                         | <i>Diversispora</i>     |                                 | <i>Nodularia</i>                  |
|                         | <i>Echinoderma</i>      |                                 | <i>Oceanobacillus</i>             |
|                         | <i>Efibulobasidium</i>  |                                 | <i>Perlucidibaca</i>              |
|                         | <i>Entyloma</i>         |                                 | <i>Pigmentiphaga</i>              |
|                         | <i>Erythrobasidium</i>  |                                 | <i>Planomicrobium</i>             |
|                         | <i>Exserohilum</i>      |                                 | <i>Rubrobacter</i>                |

|  |                          |  |                          |
|--|--------------------------|--|--------------------------|
|  | <i>Filobasidium</i>      |  | <i>Rudanella</i>         |
|  | <i>Flagelloscypha</i>    |  | <i>Ruminococcus</i>      |
|  | <i>Geminibasidium</i>    |  | <i>Saccharomonospora</i> |
|  | <i>Geomyces</i>          |  | <i>Salinispora</i>       |
|  | <i>Gjaerumia</i>         |  | <i>Sedimentibacter</i>   |
|  | <i>Gliomastix</i>        |  | <i>SMB53</i>             |
|  | <i>Glomosporium</i>      |  | <i>Solitalea</i>         |
|  | <i>Glomus</i>            |  | <i>Spirochaeta</i>       |
|  | <i>Hanseniасpora</i>     |  | <i>Spirosoma</i>         |
|  | <i>Hebeloma</i>          |  | <i>Sporanaerobacter</i>  |
|  | <i>Helicoma</i>          |  | <i>Sporotomaculum</i>    |
|  | <i>Hydnum</i>            |  | <i>Thermobifida</i>      |
|  | <i>Kochiomyces</i>       |  | <i>Thermobispora</i>     |
|  | <i>Kodamaea</i>          |  | <i>Thermovenabulum</i>   |
|  | <i>Kurtzmanomyces</i>    |  | <i>Thiobacillus</i>      |
|  | <i>Leptodiscella</i>     |  | <i>Turneriella</i>       |
|  | <i>Lichtheimia</i>       |  | <i>Virgibacillus</i>     |
|  | <i>Lophiostoma</i>       |  | <i>WCHB1-84</i>          |
|  | <i>Lycoperdon</i>        |  |                          |
|  | <i>Macrophomina</i>      |  |                          |
|  | <i>Marasmius</i>         |  |                          |
|  | <i>Mariannaea</i>        |  |                          |
|  | <i>Microstroma</i>       |  |                          |
|  | <i>Mycena</i>            |  |                          |
|  | <i>Myrmecridium</i>      |  |                          |
|  | <i>Neobulgaria</i>       |  |                          |
|  | <i>Nigrospora</i>        |  |                          |
|  | <i>Occultifur</i>        |  |                          |
|  | <i>Omphalotus</i>        |  |                          |
|  | <i>Operculomyces</i>     |  |                          |
|  | <i>Ophiosphaerella</i>   |  |                          |
|  | <i>Paraglomus</i>        |  |                          |
|  | <i>Parasola</i>          |  |                          |
|  | <i>Periconia</i>         |  |                          |
|  | <i>Petriella</i>         |  |                          |
|  | <i>Phaffia</i>           |  |                          |
|  | <i>Phialocephala</i>     |  |                          |
|  | <i>Pholiota</i>          |  |                          |
|  | <i>Pithoascus</i>        |  |                          |
|  | <i>Pleurostoma</i>       |  |                          |
|  | <i>Pleurotheciella</i>   |  |                          |
|  | <i>Polyschema</i>        |  |                          |
|  | <i>Pringsheimia</i>      |  |                          |
|  | <i>Protomyces</i>        |  |                          |
|  | <i>Psathyrella</i>       |  |                          |
|  | <i>Pseudopyricularia</i> |  |                          |
|  | <i>Psilocybe</i>         |  |                          |
|  | <i>Ramicandelaber</i>    |  |                          |
|  | <i>Ramularia</i>         |  |                          |
|  | <i>Rhizoctonia</i>       |  |                          |

|  |                          |  |  |
|--|--------------------------|--|--|
|  | <i>Saccharicola</i>      |  |  |
|  | <i>Saccharomycopsis</i>  |  |  |
|  | <i>Sarocladium</i>       |  |  |
|  | <i>Schizothecium</i>     |  |  |
|  | <i>Scleroderma</i>       |  |  |
|  | <i>Sclerotinia</i>       |  |  |
|  | <i>Scutellospora</i>     |  |  |
|  | <i>Selinia</i>           |  |  |
|  | <i>Setophaeosphaeria</i> |  |  |
|  | <i>Skeletocutis</i>      |  |  |
|  | <i>Sphacelotheca</i>     |  |  |
|  | <i>Spiromastix</i>       |  |  |
|  | <i>Sporisorium</i>       |  |  |
|  | <i>Steccherinum</i>      |  |  |
|  | <i>Stylonectria</i>      |  |  |
|  | <i>Taphrina</i>          |  |  |
|  | <i>Tetracladium</i>      |  |  |
|  | <i>Tetraplospora</i>     |  |  |
|  | <i>Tilletiopsis</i>      |  |  |
|  | <i>Tomentella</i>        |  |  |
|  | <i>Torulaspora</i>       |  |  |
|  | <i>Tremella</i>          |  |  |
|  | <i>Trichophyton</i>      |  |  |
|  | <i>Tulostoma</i>         |  |  |
|  | <i>Verrucaria</i>        |  |  |
|  | <i>Wickerhamomyces</i>   |  |  |
